# Supplementary material
Source: Springer Nature journal article supplement (https://www.springermedizin.de/resource/supplementary/12874_2013_1024_MOESM2_ESM.pdf/9433096)
Supplement: MOESM2 [file 9433096]

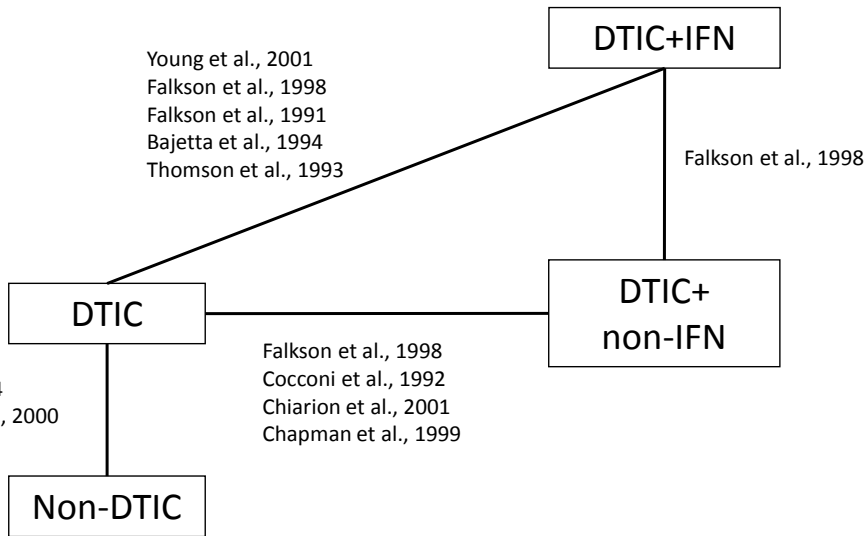

*DTIC=dacarbazine; DTIC+IFN=dacarbazine plus Interferon; DTIC+non-IFN=dacarbazine plus non-interferon interventions; Non-DTIC=Non-dacarbazine interventions;*
